# Supplementary material
Source: PubMed Central journal article supplement (PMC2803151)
Supplement: en.2009-0085_1.pdf [file en.2009-0085_1.pdf]

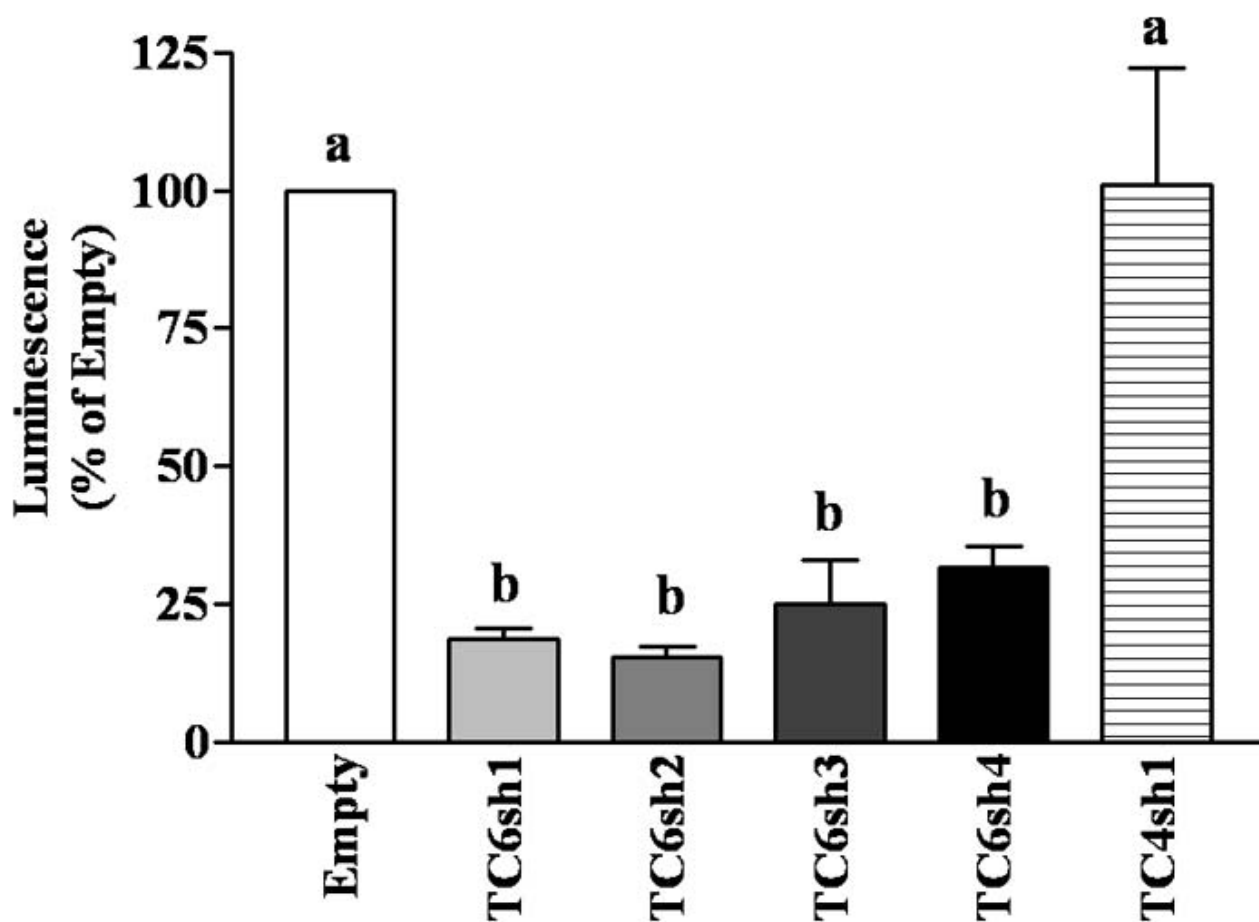

### Supplementary data

FIG. 1. Ability of four TRPC6 shRNA plasmid constructs to inhibit expression of a TRPC6 reporter in the psiCHECK 2 system. Renilla luciferase luminescence was measured in cells co-transfected with the TRPC6 reporter and empty pSHAG vector, plasmids expressing TRPC6 shRNAs (TC6sh1-4), or a plasmid expressing a TRPC4 shRNA sequence (TC4sh1). Data are expressed as mean  $\pm$  se (n=3). Significant differences between groups are indicated by different lower case letters.
